# Supplementary material for: A Comprehensive Evaluation of Effects on Water-Level Deficits on Tomato Polyphenol Composition, Nutritional Quality and Antioxidant Capacity
Source: MDPI journal article supplement (doi:10.3390/antiox11081585), 2022-08-16
Supplement: s1 [file s1]

**Table S1.** Component matrix of tomato fruit quality and antioxidant capacity under different levels of water deficit.

| Index                 | Component |        |        |        |
|-----------------------|-----------|--------|--------|--------|
|                       | 1         | 2      | 3      | 4      |
| Rutin                 | 0.863     | 0.044  | 0.449  | 0.228  |
| Quercetin             | 0.717     | -0.519 | -0.449 | 0.124  |
| Naringenin            | 0.757     | -0.513 | 0.329  | 0.236  |
| Kaempferol            | 0.023     | 0.506  | 0.818  | 0.273  |
| Total flavonoids      | 0.932     | -0.293 | 0.019  | 0.212  |
| Protocatechuic acid   | 0.677     | 0.439  | 0.558  | -0.196 |
| P-hydroxybenzoic acid | 0.463     | -0.821 | -0.309 | -0.125 |
| Chlorogenic acid      | 0.896     | -0.429 | -0.110 | 0.018  |
| Gallic acid           | 0.923     | 0.008  | -0.305 | 0.236  |
| P-coumaric acid       | 0.257     | 0.148  | -0.949 | 0.110  |
| Ferulic acid          | 0.730     | 0.349  | -0.506 | -0.299 |
| Benzoic acid          | 0.964     | 0.151  | -0.109 | -0.191 |
| Cinnamic acid         | 0.321     | 0.618  | 0.167  | 0.698  |
| Gentisic acid         | 0.826     | -0.306 | 0.253  | 0.401  |
| Caffeic acid          | 0.367     | 0.704  | -0.534 | 0.293  |
| Cynarin               | 0.562     | -0.789 | 0.208  | 0.132  |
| Sinapic acid          | -0.130    | 0.947  | -0.075 | 0.285  |
| Total phenols         | 0.957     | -0.273 | -0.098 | -0.011 |
| ABTS                  | 0.940     | -0.258 | -0.096 | -0.200 |
| HSRA                  | 0.866     | -0.016 | -0.269 | 0.422  |
| FRAP                  | 0.507     | -0.667 | 0.537  | 0.098  |
| DPPH                  | 0.650     | 0.742  | 0.115  | 0.113  |
| Soluble solids        | 0.601     | 0.493  | 0.547  | -0.310 |
| Soluble protein       | 0.856     | 0.185  | 0.212  | -0.433 |
| Vitamin C             | 0.599     | 0.004  | 0.275  | -0.752 |
| Soluble sugar         | 0.611     | 0.484  | -0.239 | -0.579 |
| Titrateable acid      | -0.777    | -0.396 | 0.371  | -0.319 |
| Sugar acid ratio      | 0.732     | 0.498  | -0.308 | -0.348 |
| Nitrate               | 0.762     | 0.417  | 0.492  | 0.053  |

Extraction method: principal component analysis. 4 components extracted.

ABTS, HSRA, FRAP and DPPH are as defined in the Figure 1 legend.
